# Supplementary material
Source: publisher figshare collection journal article supplement (https://karger.figshare.com/ndownloader/files/14065388)
Supplement: Supplementary file 1 [file 14065388]

**Supplemental Table 1: Correlations between outcomes The Matrix Spectral Decomposition (MatSpD,** [**https://gump.qimr.edu.au/general/daleN/matSpD/**](https://gump.qimr.edu.au/general/daleN/matSpD/)**) method**

| **Correlation among outcomes in EA samples** | | | | |  |
| --- | --- | --- | --- | --- | --- |
|  |
|  |
|  | **All-Cause Mortality** | **Cardiovascular Death** | **Sudden Cardiac Death** | **Heart Failure** |  |
| **All-Cause Mortality** | 1.00 | 0.92 | 0.96 | 0.95 |  |
| **Cardiovascular Death** | 0.92 | 1.00 | 0.93 | 0.87 |  |
| **Sudden Cardiac Death** | 0.96 | 0.93 | 1.00 | 0.90 |  |
| **Heart Failure** | 0.95 | 0.87 | 0.90 | 1.00 |  |
|  |  |  |  |  |  |
|  |  |  |  |  |  |
|  |  |  |  |  |  |
|  |  |  |  |  |  |
| **Correlation among outcomes in AA samples** | | | | |  |
|  |
|  | **All-Cause Mortality** | **Cardiovascular Death** | **Sudden Cardiac Death** | **Heart Failure** |  |
| **All-Cause Mortality** | 1.00 | 0.92 | 0.95 | 0.88 |  |
| **Cardiovascular Death** | 0.92 | 1.00 | 0.94 | 0.82 |  |
| **Sudden Cardiac Death** | 0.95 | 0.94 | 1.00 | 0.85 |  |
| **Heart Failure** | 0.88 | 0.82 | 0.85 | 1.00 |  |
